# Supplementary material for: Matrix isolation and low temperature solid state FTIR spectroscopic study of α-furil
Source: Royal Society of Chemistry journal article supplement (doi:10.1039/b516164a), 2006-01-01
Supplement: b516164a.pdf [file b516164a.pdf]

Table S1 – Definition of internal symmetry coordinates used in the normal mode analysis of conformers **I** and **III** of  $\alpha$ -fural.

|                 | Definition <sup>a</sup>                                                                                                                                                                                                                                                                                      | Symmetry <sup>b</sup> | Approximate description     |
|-----------------|--------------------------------------------------------------------------------------------------------------------------------------------------------------------------------------------------------------------------------------------------------------------------------------------------------------|-----------------------|-----------------------------|
| S <sub>1</sub>  | $v(C_1-C_3)$                                                                                                                                                                                                                                                                                                 | A                     | $v(C-C)$                    |
| S <sub>2</sub>  | $v(C_1=O_2)+v(C_3=O_4)$                                                                                                                                                                                                                                                                                      | A                     | $v(C=O)$ s                  |
| S <sub>3</sub>  | $v(C_1=O_2)-v(C_3=O_4)$                                                                                                                                                                                                                                                                                      | B                     | $v(C=O)$ as                 |
| S <sub>4</sub>  | $v(C_1-C_5)+v(C_3-C_{13})$                                                                                                                                                                                                                                                                                   | A                     | $v(C-C_\alpha)$ s           |
| S <sub>5</sub>  | $v(C_1-C_5)-v(C_3-C_{13})$                                                                                                                                                                                                                                                                                   | B                     | $v(C-C_\alpha)$ as          |
| S <sub>6</sub>  | $v(C_7-C_8)+v(C_8-O_9)+v(O_9-C_5)+v(C_5-C_6)+v(C_6-C_7)+$<br>$+v(C_{15}-C_{16})+v(C_{16}-O_{17})+v(O_{17}-C_{13})+v(C_{13}-C_{14})+v(C_{14}-C_{15})$                                                                                                                                                         | A                     | $v(\text{ring } 1)$ s       |
| S <sub>7</sub>  | $v(C_7-C_8)+v(C_8-O_9)+v(O_9-C_5)+v(C_5-C_6)+v(C_6-C_7)-$<br>$-v(C_{15}-C_{16})-v(C_{16}-O_{17})-v(O_{17}-C_{13})-v(C_{13}-C_{14})-v(C_{14}-C_{15})$                                                                                                                                                         | B                     | $v(\text{ring } 1)$ as      |
| S <sub>8</sub>  | $v(C_7-C_8)+v(C_5-C_6)+v(C_{15}-C_{16})+v(C_{13}-C_{14})$                                                                                                                                                                                                                                                    | A                     | $v(\text{ring } 2)$ s       |
| S <sub>9</sub>  | $v(C_7-C_8)+v(C_5-C_6)-v(C_{15}-C_{16})-v(C_{13}-C_{14})$                                                                                                                                                                                                                                                    | B                     | $v(\text{ring } 2)$ as      |
| S <sub>10</sub> | $v(C_7-C_8)-v(C_5-C_6)+v(C_{15}-C_{16})-v(C_{13}-C_{14})$                                                                                                                                                                                                                                                    | A                     | $v(\text{ring } 3)$ s       |
| S <sub>11</sub> | $v(C_7-C_8)-v(C_5-C_6)-v(C_{15}-C_{16})+v(C_{13}-C_{14})$                                                                                                                                                                                                                                                    | B                     | $v(\text{ring } 3)$ as      |
| S <sub>12</sub> | $2v(C_6-C_7)-v(C_8-O_9)-v(O_9-C_5)+2v(C_{14}-C_{15})-v(C_{16}-O_{17})-v(O_{17}-C_{13})$                                                                                                                                                                                                                      | A                     | $v(\text{ring } 4)$ s       |
| S <sub>13</sub> | $2v(C_6-C_7)-v(C_8-O_9)-v(O_9-C_5)-2v(C_{14}-C_{15})+v(C_{16}-O_{17})+v(O_{17}-C_{13})$                                                                                                                                                                                                                      | B                     | $v(\text{ring } 4)$ as      |
| S <sub>14</sub> | $v(C_8-O_9)-v(O_9-C_5)+v(C_{16}-O_{17})-v(O_{17}-C_{13})$                                                                                                                                                                                                                                                    | A                     | $v(\text{ring } 5)$ s       |
| S <sub>15</sub> | $v(C_8-O_9)-v(O_9-C_5)-v(C_{16}-O_{17})+v(O_{17}-C_{13})$                                                                                                                                                                                                                                                    | B                     | $v(\text{ring } 5)$ as      |
| S <sub>16</sub> | $v(C_6-H_{10})+v(C_7-H_{11})+v(C_8-H_{12})+v(C_{14}-H_{18})+v(C_{15}-H_{19})+v(C_{16}-H_{20})$                                                                                                                                                                                                               | A                     | $v(C-H)$ 1 s                |
| S <sub>17</sub> | $v(C_6-H_{10})+v(C_7-H_{11})+v(C_8-H_{12})-v(C_{14}-H_{18})-v(C_{15}-H_{19})-v(C_{16}-H_{20})$                                                                                                                                                                                                               | B                     | $v(C-H)$ 1 as               |
| S <sub>18</sub> | $v(C_6-H_{10})-v(C_8-H_{12})+v(C_{14}-H_{18})-v(C_{16}-H_{20})$                                                                                                                                                                                                                                              | A                     | $v(C-H)$ 2 s                |
| S <sub>19</sub> | $v(C_6-H_{10})-v(C_8-H_{12})-v(C_{14}-H_{18})+v(C_{16}-H_{20})$                                                                                                                                                                                                                                              | B                     | $v(C-H)$ 2 as               |
| S <sub>20</sub> | $v(C_6-H_{10})-2v(C_7-H_{11})+v(C_8-H_{12})+v(C_{14}-H_{18})-2v(C_{15}-H_{19})+v(C_{16}-H_{20})$                                                                                                                                                                                                             | A                     | $v(C-H)$ 3 s                |
| S <sub>21</sub> | $v(C_6-H_{10})-2v(C_7-H_{11})+v(C_8-H_{12})-v(C_{14}-H_{18})+2v(C_{15}-H_{19})-v(C_{16}-H_{20})$                                                                                                                                                                                                             | B                     | $v(C-H)$ 3 as               |
| S <sub>22</sub> | $\delta(C_5-C_1=O_2)-\delta(C_3-C_1=O_2)+\delta(C_{13}-C_3=O_4)-\delta(C_1-C_3-C_4)$                                                                                                                                                                                                                         | A                     | $\delta(C=O)$ s             |
| S <sub>23</sub> | $\delta(C_5-C_1=O_2)-\delta(C_3-C_1=O_2)-\delta(C_{13}-C_3=O_4)+\delta(C_1-C_3-C_4)$                                                                                                                                                                                                                         | B                     | $\delta(C=O)$ as            |
| S <sub>24</sub> | $2\delta(C_5-C_1-C_3)-\delta(C_5-C_1-C_2)-\delta(C_3-C_1-C_2)+2\delta(C_{13}-C_3-C_1)-\delta(C_{13}-C_3-C_4)-\delta(C_1-C_3-C_4)$                                                                                                                                                                            | A                     | $\delta(CCC_\alpha)$ s      |
| S <sub>25</sub> | $2\delta(C_5-C_1-C_3)-\delta(C_5-C_1-C_2)-\delta(C_3-C_1-C_2)-2\delta(C_{13}-C_3-C_1)+\delta(C_{13}-C_3-C_4)+\delta(C_1-C_3-C_4)$                                                                                                                                                                            | B                     | $\delta(CCC_\alpha)$ as     |
| S <sub>26</sub> | $\delta(C_6-C_5-C_1)-\delta(O_9-C_5-C_1)+\delta(C_{14}-C_{13}-C_3)-\delta(O_{17}-C_{13}-C_3)$                                                                                                                                                                                                                | A                     | $\omega(\text{ring})$ s     |
| S <sub>27</sub> | $\delta(C_6-C_5-C_1)-\delta(O_9-C_5-C_1)-\delta(C_{14}-C_{13}-C_3)+\delta(O_{17}-C_{13}-C_3)$                                                                                                                                                                                                                | B                     | $\omega(\text{ring})$ as    |
| S <sub>28</sub> | $\delta(C_8-O_9-C_5)-0.809\delta(C_7-C_8-O_9)-0.809\delta(O_9-C_5-C_6)+0.309\delta(C_6-C_7-C_8)+$<br>$+0.309\delta(C_5-C_6-C_7)+\delta(C_{16}-O_{17}-C_{13})-0.809\delta(C_{15}-C_{16}-O_{17})-0.809\delta(O_{17}-C_{13}-C_{14})+$<br>$+0.309\delta(C_{14}-C_{15}-C_{16})+0.309\delta(C_{13}-C_{14}-C_{15})$ | A                     | $\delta(\text{ring } 1)$ s  |
| S <sub>29</sub> | $\delta(C_8-O_9-C_5)-0.809\delta(C_7-C_8-O_9)-0.809\delta(O_9-C_5-C_6)+0.309\delta(C_6-C_7-C_8)+$<br>$+0.309\delta(C_5-C_6-C_7)-\delta(C_{16}-O_{17}-C_{13})+0.809\delta(C_{15}-C_{16}-O_{17})+0.809\delta(O_{17}-C_{13}-C_{14})-$<br>$-0.309\delta(C_{14}-C_{15}-C_{16})-0.309\delta(C_{13}-C_{14}-C_{15})$ | B                     | $\delta(\text{ring } 1)$ as |
| S <sub>30</sub> | $-1.118\delta(C_7-C_8-O_9)+1.118\delta(O_9-C_5-C_6)+1.809\delta(C_6-C_7-C_8)-1.809\delta(C_5-C_6-C_7)-$<br>$-1.118\delta(C_{15}-C_{16}-O_{17})+1.118\delta(O_{17}-C_{13}-C_{14})+1.809\delta(C_{14}-C_{15}-C_{16})-1.809\delta(C_{13}-C_{14}-C_{15})$                                                        | A                     | $\delta(\text{ring } 2)$ s  |
| S <sub>31</sub> | $-1.118\delta(C_7-C_8-O_9)+1.118\delta(O_9-C_5-C_6)+1.809\delta(C_6-C_7-C_8)-1.809\delta(C_5-C_6-C_7)+$                                                                                                                                                                                                      | B                     | $\delta(\text{ring } 2)$ as |

Supplementary Material for PCCP  
 This journal is © The Owner Societies 2006

|                 |                                                                                                                                                                                                                                                                                                                                                 |   |                            |
|-----------------|-------------------------------------------------------------------------------------------------------------------------------------------------------------------------------------------------------------------------------------------------------------------------------------------------------------------------------------------------|---|----------------------------|
|                 | $+1.118\delta(C_{15}-C_{16}-O_{17})-1.118\delta(O_{17}-C_{13}-C_{14})-1.809\delta(C_{14}-C_{15}-C_{16})+1.809\delta(C_{13}-C_{14}-C_{15})$                                                                                                                                                                                                      |   |                            |
| S <sub>32</sub> | $\delta(C_5-C_6-H_{10})-\delta(C_7-C_6-H_{10})+\delta(C_6-C_7-H_{11})-\delta(C_8-C_7-H_{11})+\delta(C_7-C_8-H_{12}) -$<br>$-\delta(O_9-C_8-H_{12})+\delta(C_{13}-C_{14}-H_{18})-\delta(C_{15}-C_{14}-H_{18})+\delta(C_{14}-C_{15}-H_{19})-\delta(C_{16}-C_{15}-H_{19})+$<br>$+\delta(C_{15}-C_{16}-H_{20})-\delta(O_{17}-C_{16}-H_{20})$        | A | $\delta(C-H\ 1)\ s$        |
| S <sub>33</sub> | $\delta(C_5-C_6-H_{10})-\delta(C_7-C_6-H_{10})+\delta(C_6-C_7-H_{11})-\delta(C_8-C_7-H_{11})+\delta(C_7-C_8-H_{12}) -$<br>$-\delta(O_9-C_8-H_{12})-\delta(C_{13}-C_{14}-H_{18})+\delta(C_{15}-C_{14}-H_{18})-\delta(C_{14}-C_{15}-H_{19})+\delta(C_{16}-C_{15}-H_{19})-$<br>$-\delta(C_{15}-C_{16}-H_{20})+\delta(O_{17}-C_{16}-H_{20})$        | B | $\delta(C-H\ 1)\ as$       |
| S <sub>34</sub> | $\delta(C_5-C_6-H_{10})-\delta(C_7-C_6-H_{10})-\delta(C_7-C_8-H_{12})+\delta(O_9-C_8-H_{12})+$<br>$+\delta(C_{13}-C_{14}-H_{18})-\delta(C_{15}-C_{14}-H_{18})-\delta(C_{15}-C_{16}-H_{20})+\delta(O_{17}-C_{16}-H_{20})$                                                                                                                        | A | $\delta(C-H\ 2)\ s$        |
| S <sub>35</sub> | $\delta(C_5-C_6-H_{10})-\delta(C_7-C_6-H_{10})-\delta(C_7-C_8-H_{12})+\delta(O_9-C_8-H_{12})-$<br>$-\delta(C_{13}-C_{14}-H_{18})+\delta(C_{15}-C_{14}-H_{18})+\delta(C_{15}-C_{16}-H_{20})-\delta(O_{17}-C_{16}-H_{20})$                                                                                                                        | B | $\delta(C-H\ 2)\ as$       |
| S <sub>36</sub> | $\delta(C_5-C_6-H_{10})-\delta(C_7-C_6-H_{10})-2\delta(C_6-C_7-H_{11})+2\delta(C_8-C_7-H_{11})+\delta(C_7-C_8-H_{12}) -$<br>$-\delta(O_9-C_8-H_{12})+\delta(C_{13}-C_{14}-H_{18})-\delta(C_{15}-C_{14}-H_{18})-2\delta(C_{14}-C_{15}-H_{19})+2\delta(C_{16}-C_{15}-H_{19})+$<br>$+\delta(C_{15}-C_{16}-H_{20})-\delta(O_{17}-C_{16}-H_{20})$    | A | $\delta(C-H\ 3)\ s$        |
| S <sub>37</sub> | $\delta(C_5-C_6-H_{10})-\delta(C_7-C_6-H_{10})-2\delta(C_6-C_7-H_{11})+2\delta(C_8-C_7-H_{11})+\delta(C_7-C_8-H_{12}) -$<br>$-\delta(O_9-C_8-H_{12})-\delta(C_{13}-C_{14}-H_{18})+\delta(C_{15}-C_{14}-H_{18})+2\delta(C_{14}-C_{15}-H_{19})-2\delta(C_{16}-C_{15}-H_{19})-$<br>$-\delta(C_{15}-C_{16}-H_{20})+\delta(O_{17}-C_{16}-H_{20})$    | B | $\delta(C-H\ 3)\ as$       |
| S <sub>38</sub> | $\tau(C_8-C_7-C_6-C_5)-0.809\tau(O_9-C_8-C_7-C_6)-0.809\tau(C_7-C_6-C_5-O_9)+0.309\tau(C_5-O_9-C_8-C_7)+$<br>$+0.309\tau(C_6-C_5-O_9-C_8)+\tau(C_{16}-C_{15}-C_{14}-C_{13})-0.809\tau(O_{17}-C_{16}-C_{15}-C_{14})-$<br>$-0.809\tau(C_{15}-C_{14}-C_{13}-O_{17})+0.309\tau(C_{13}-O_{17}-C_{16}-C_{15})+0.309\tau(C_{14}-C_{13}-O_{17}-C_{16})$ | A | $\tau(\text{ring } 1)\ s$  |
| S <sub>39</sub> | $\tau(C_8-C_7-C_6-C_5)-0.809\tau(O_9-C_8-C_7-C_6)-0.809\tau(C_7-C_6-C_5-O_9)+0.309\tau(C_5-O_9-C_8-C_7)+$<br>$+0.309\tau(C_6-C_5-O_9-C_8)-\tau(C_{16}-C_{15}-C_{14}-C_{13})+0.809\tau(O_{17}-C_{16}-C_{15}-C_{14})+$<br>$+0.809\tau(C_{15}-C_{14}-C_{13}-O_{17})-0.309\tau(C_{13}-O_{17}-C_{16}-C_{15})-0.309\tau(C_{14}-C_{13}-O_{17}-C_{16})$ | B | $\tau(\text{ring } 1)\ as$ |
| S <sub>40</sub> | $1.118\tau(O_9-C_8-C_7-C_6)-1.118\tau(C_7-C_6-C_5-O_9)-1.809\tau(C_5-O_9-C_8-C_7)+$<br>$+1.809\tau(C_6-C_5-O_9-C_8)+1.118\tau(O_{17}-C_{16}-C_{15}-C_{14})-1.118\tau(C_{15}-C_{14}-C_{13}-O_{17})-$<br>$-1.809\tau(C_{13}-O_{17}-C_{16}-C_{15})+1.809\tau(C_{14}-C_{13}-O_{17}-C_{16})$                                                         | A | $\tau(\text{ring } 2)\ s$  |
| S <sub>41</sub> | $1.118\tau(O_9-C_8-C_7-C_6)-1.118\tau(C_7-C_6-C_5-O_9)-1.809\tau(C_5-O_9-C_8-C_7)+$<br>$+1.809\tau(C_6-C_5-O_9-C_8)-1.118\tau(O_{17}-C_{16}-C_{15}-C_{14})+1.118\tau(C_{15}-C_{14}-C_{13}-O_{17})+$<br>$+1.809\tau(C_{13}-O_{17}-C_{16}-C_{15})-1.809\tau(C_{14}-C_{13}-O_{17}-C_{16})$                                                         | B | $\tau(\text{ring } 2)\ as$ |
| S <sub>42</sub> | $\gamma(C_1-C_6-C_5-O_9)+\gamma(C_3-C_{14}-C_{13}-O_{17})$                                                                                                                                                                                                                                                                                      | A | $\gamma(\text{ring})\ s$   |
| S <sub>43</sub> | $\gamma(C_1-C_6-C_5-O_9)-\gamma(C_3-C_{14}-C_{13}-O_{17})$                                                                                                                                                                                                                                                                                      | B | $\gamma(\text{ring})\ as$  |
| S <sub>44</sub> | $\tau(O_2=C_1-C_3=O_4)+\tau(O_2=C_1-C_3-C_{13})+\tau(C_5-C_1-C_3-C_{13})+\tau(C_5-C_1-C_3=O_4)$                                                                                                                                                                                                                                                 | A | $\tau(C-C)$                |
| S <sub>45</sub> | $\tau(O_9-C_5-C_1-C_3)+\tau(C_6-C_5-C_1-C_3)+\tau(O_{17}-C_{13}-C_3-C_1)+\tau(C_{14}-C_{13}-C_3-C_1)+$<br>$+\tau(O_9-C_5-C_1=O_2)+\tau(C_6-C_5-C_1=O_2)+\tau(O_{17}-C_{13}-C_3=O_4)+\tau(C_{14}-C_{13}-C_3=O_4)$                                                                                                                                | A | $\tau(C-C_\alpha)\ s$      |
| S <sub>46</sub> | $\tau(O_9-C_5-C_1-C_3)+\tau(C_6-C_5-C_1-C_3)-\tau(O_{17}-C_{13}-C_3-C_1)-\tau(C_{14}-C_{13}-C_3-C_1)+$<br>$+\tau(O_9-C_5-C_1=O_2)+\tau(C_6-C_5-C_1=O_2)-\tau(O_{17}-C_{13}-C_3=O_4)-\tau(C_{14}-C_{13}-C_3=O_4)$                                                                                                                                | B | $\tau(C-C_\alpha)\ as$     |
| S <sub>47</sub> | $\gamma(O_2=C_3-C_1-C_5)+\gamma(O_4=C_1-C_3-C_{13})$                                                                                                                                                                                                                                                                                            | A | $\gamma(C=O)\ s$           |
| S <sub>48</sub> | $\gamma(O_2=C_3-C_1-C_5)-\gamma(O_4=C_1-C_3-C_{13})$                                                                                                                                                                                                                                                                                            | B | $\gamma(C=O)\ as$          |
| S <sub>49</sub> | $\gamma(H_{10}-C_5-C_6-C_7)+\gamma(H_{11}-C_6-C_7-C_8)+\gamma(H_{12}-C_7-C_8-O_9)+$<br>$+\gamma(H_{19}-C_{13}-C_{14}-C_{15})+\gamma(H_{19}-C_{14}-C_{15}-C_{16})+\gamma(H_{20}-C_{15}-C_{16}-O_{17})$                                                                                                                                           | A | $\gamma(C-H\ 1)\ s$        |
| S <sub>50</sub> | $\gamma(H_{10}-C_5-C_6-C_7)+\gamma(H_{11}-C_6-C_7-C_8)+\gamma(H_{12}-C_7-C_8-O_9)-$<br>$-\gamma(H_{19}-C_{13}-C_{14}-C_{15})-\gamma(H_{19}-C_{14}-C_{15}-C_{16})-\gamma(H_{20}-C_{15}-C_{16}-O_{17})$                                                                                                                                           | B | $\gamma(C-H\ 1)\ as$       |

Supplementary Material for PCCP

This journal is © The Owner Societies 2006

|                 |                                                                                                                                                                                                                                                                                                                                                                                                                           |   |                            |
|-----------------|---------------------------------------------------------------------------------------------------------------------------------------------------------------------------------------------------------------------------------------------------------------------------------------------------------------------------------------------------------------------------------------------------------------------------|---|----------------------------|
| S <sub>51</sub> | $\gamma(\text{H}_{10}\text{-C}_5\text{-C}_6\text{-C}_7)\text{-}\gamma(\text{H}_{12}\text{-C}_7\text{-C}_8\text{-O}_9)\text{+}\gamma(\text{H}_{19}\text{-C}_{13}\text{-C}_{14}\text{-C}_{15})\text{-}\gamma(\text{H}_{20}\text{-C}_{15}\text{-C}_{16}\text{-O}_{17})$                                                                                                                                                      | A | $\gamma(\text{C-H } 2)$ s  |
| S <sub>52</sub> | $\gamma(\text{H}_{10}\text{-C}_5\text{-C}_6\text{-C}_7)\text{-}\gamma(\text{H}_{12}\text{-C}_7\text{-C}_8\text{-O}_9)\text{-}\gamma(\text{H}_{19}\text{-C}_{13}\text{-C}_{14}\text{-C}_{15})\text{+}\gamma(\text{H}_{20}\text{-C}_{15}\text{-C}_{16}\text{-O}_{17})$                                                                                                                                                      | B | $\gamma(\text{C-H } 2)$ as |
| S <sub>53</sub> | $\gamma(\text{H}_{10}\text{-C}_5\text{-C}_6\text{-C}_7)\text{-}2\gamma(\text{H}_{11}\text{-C}_6\text{-C}_7\text{-C}_8)\text{+}\gamma(\text{H}_{12}\text{-C}_7\text{-C}_8\text{-O}_9)\text{+}$<br>$\text{+}\gamma(\text{H}_{19}\text{-C}_{13}\text{-C}_{14}\text{-C}_{15})\text{-}2\gamma(\text{H}_{19}\text{-C}_{14}\text{-C}_{15}\text{-C}_{16})\text{+}\gamma(\text{H}_{20}\text{-C}_{15}\text{-C}_{16}\text{-O}_{17})$ | A | $\gamma(\text{C-H } 3)$ s  |
| S <sub>54</sub> | $\gamma(\text{H}_{10}\text{-C}_5\text{-C}_6\text{-C}_7)\text{-}2\gamma(\text{H}_{11}\text{-C}_6\text{-C}_7\text{-C}_8)\text{+}\gamma(\text{H}_{12}\text{-C}_7\text{-C}_8\text{-O}_9)\text{-}$<br>$\text{-}\gamma(\text{H}_{19}\text{-C}_{13}\text{-C}_{14}\text{-C}_{15})\text{+}2\gamma(\text{H}_{19}\text{-C}_{14}\text{-C}_{15}\text{-C}_{16})\text{-}\gamma(\text{H}_{20}\text{-C}_{15}\text{-C}_{16}\text{-O}_{17})$ | B | $\gamma(\text{C-H } 3)$ as |

---

<sup>a</sup> Normalization factors not shown.  $\nu$ , bond stretching,  $\delta$ , bending,  $\gamma$ , rocking,  $\omega$ , wagging,  $\tau$ , torsion, s, symmetric, as, asymmetric. See Figure 1 for atom numbering.

<sup>b</sup> C<sub>2</sub> symmetry point group.

Table S2 – Definition of internal coordinates used in the normal mode analysis of conformer **II** of  $\alpha$ -fural.

|                 | Definition <sup>a</sup>                                                                                                                                                                                                                                                                                      | Symmetry <sup>b</sup> | Approximate description   |
|-----------------|--------------------------------------------------------------------------------------------------------------------------------------------------------------------------------------------------------------------------------------------------------------------------------------------------------------|-----------------------|---------------------------|
| S <sub>1</sub>  | $v(C_1-C_3)$                                                                                                                                                                                                                                                                                                 | A                     | $v(C-C)$                  |
| S <sub>2</sub>  | $v(C_1=O_2)$                                                                                                                                                                                                                                                                                                 | A                     | $v(C=O)$                  |
| S <sub>3</sub>  | $v(C_3=O_4)$                                                                                                                                                                                                                                                                                                 | A                     | $v(C=O)'$                 |
| S <sub>4</sub>  | $v(C_1-C_5)+v(C_3-C_{13})$                                                                                                                                                                                                                                                                                   | A                     | $v(C-C_\alpha)$           |
| S <sub>5</sub>  | $v(C_1-C_5)-v(C_3-C_{13})$                                                                                                                                                                                                                                                                                   | A                     | $v(C-C_\alpha)'$          |
| S <sub>6</sub>  | $v(C_7-C_8)+v(C_8-O_9)+v(O_9-C_5)+v(C_5-C_6)+v(C_6-C_7)$                                                                                                                                                                                                                                                     | A                     | $v(\text{ring } 1)$       |
| S <sub>7</sub>  | $v(C_{15}-C_{16})+v(C_{16}-O_{17})+v(O_{17}-C_{13})+v(C_{13}-C_{14})+v(C_{14}-C_{15})$                                                                                                                                                                                                                       | A                     | $v(\text{ring } 1)'$      |
| S <sub>8</sub>  | $v(C_7-C_8)+v(C_5-C_6)$                                                                                                                                                                                                                                                                                      | A                     | $v(\text{ring } 2)$       |
| S <sub>9</sub>  | $v(C_{15}-C_{16})+v(C_{13}-C_{14})$                                                                                                                                                                                                                                                                          | A                     | $v(\text{ring } 2)'$      |
| S <sub>10</sub> | $v(C_7-C_8)-v(C_5-C_6)$                                                                                                                                                                                                                                                                                      | A                     | $v(\text{ring } 3)$       |
| S <sub>11</sub> | $v(C_{15}-C_{16})-v(C_{13}-C_{14})$                                                                                                                                                                                                                                                                          | A                     | $v(\text{ring } 3)'$      |
| S <sub>12</sub> | $2v(C_6-C_7)-v(C_8-O_9)-v(O_9-C_5)$                                                                                                                                                                                                                                                                          | A                     | $v(\text{ring } 4)$       |
| S <sub>13</sub> | $2v(C_{14}-C_{15})-v(C_{16}-O_{17})-v(O_{17}-C_{13})$                                                                                                                                                                                                                                                        | A                     | $v(\text{ring } 4)'$      |
| S <sub>14</sub> | $v(C_8-O_9)-v(O_9-C_5)$                                                                                                                                                                                                                                                                                      | A                     | $v(\text{ring } 5)$       |
| S <sub>15</sub> | $v(C_{16}-O_{17})-v(O_{17}-C_{13})$                                                                                                                                                                                                                                                                          | A                     | $v(\text{ring } 5)'$      |
| S <sub>16</sub> | $v(C_6-H_{10})+v(C_7-H_{11})+v(C_8-H_{12})$                                                                                                                                                                                                                                                                  | A                     | $v(C-H 1)$                |
| S <sub>17</sub> | $v(C_{14}-H_{18})+v(C_{15}-H_{19})+v(C_{16}-H_{20})$                                                                                                                                                                                                                                                         | A                     | $v(C-H 1)'$               |
| S <sub>18</sub> | $v(C_6-H_{10})-v(C_8-H_{12})$                                                                                                                                                                                                                                                                                | A                     | $v(C-H 2)$                |
| S <sub>19</sub> | $v(C_{14}-H_{18})-v(C_{16}-H_{20})$                                                                                                                                                                                                                                                                          | A                     | $v(C-H 2)'$               |
| S <sub>20</sub> | $v(C_6-H_{10})-2v(C_7-H_{11})+v(C_8-H_{12})$                                                                                                                                                                                                                                                                 | A                     | $v(C-H 3)$                |
| S <sub>21</sub> | $v(C_{14}-H_{18})-2v(C_{15}-H_{19})+v(C_{16}-H_{20})$                                                                                                                                                                                                                                                        | A                     | $v(C-H 3)'$               |
| S <sub>22</sub> | $\delta(C_5-C_1=O_2)-\delta(C_3-C_1=O_2)+\delta(C_{13}-C_3=O_4)-\delta(C_1-C_3-C_4)$                                                                                                                                                                                                                         | A                     | $\delta(C=O)$             |
| S <sub>23</sub> | $\delta(C_5-C_1=O_2)-\delta(C_3-C_1=O_2)-\delta(C_{13}-C_3=O_4)+\delta(C_1-C_3-C_4)$                                                                                                                                                                                                                         | A                     | $\delta(C=O)'$            |
| S <sub>24</sub> | $2\delta(C_5-C_1-C_3)-\delta(C_5-C_1-C_2)-\delta(C_3-C_1-C_2)+2\delta(C_{13}-C_3-C_1)-\delta(C_{13}-C_3-C_4)-\delta(C_1-C_3-C_4)$                                                                                                                                                                            | A                     | $\delta(CCC_\alpha)$      |
| S <sub>25</sub> | $2\delta(C_{13}-C_3-C_1)-\delta(C_{13}-C_3-C_4)-\delta(C_1-C_3-C_4)-2\delta(C_{13}-C_3-C_1)+\delta(C_{13}-C_3-C_4)+\delta(C_1-C_3-C_4)$                                                                                                                                                                      | A                     | $\delta(CCC_\alpha)'$     |
| S <sub>26</sub> | $\delta(C_6-C_5-C_1)-\delta(O_9-C_5-C_1)+\delta(C_{14}-C_{13}-C_3)-\delta(O_{17}-C_{13}-C_3)$                                                                                                                                                                                                                | A                     | $\omega(\text{ring})$     |
| S <sub>27</sub> | $\delta(C_6-C_5-C_1)-\delta(O_9-C_5-C_1)-\delta(C_{14}-C_{13}-C_3)+\delta(O_{17}-C_{13}-C_3)$                                                                                                                                                                                                                | A                     | $\omega(\text{ring})'$    |
| S <sub>28</sub> | $\delta(C_8-O_9-C_5)-0.809\delta(C_7-C_8-O_9)-0.809\delta(O_9-C_5-C_6)+0.309\delta(C_6-C_7-C_8)+$<br>$+0.309\delta(C_5-C_6-C_7)+\delta(C_{16}-O_{17}-C_{13})-0.809\delta(C_{15}-C_{16}-O_{17})-0.809\delta(O_{17}-C_{13}-C_{14})+$<br>$+0.309\delta(C_{14}-C_{15}-C_{16})+0.309\delta(C_{13}-C_{14}-C_{15})$ | A                     | $\delta(\text{ring } 1)$  |
| S <sub>29</sub> | $\delta(C_8-O_9-C_5)-0.809\delta(C_7-C_8-O_9)-0.809\delta(O_9-C_5-C_6)+0.309\delta(C_6-C_7-C_8)+$<br>$+0.309\delta(C_5-C_6-C_7)-\delta(C_{16}-O_{17}-C_{13})+0.809\delta(C_{15}-C_{16}-O_{17})+0.809\delta(O_{17}-C_{13}-C_{14})-$<br>$-0.309\delta(C_{14}-C_{15}-C_{16})-0.309\delta(C_{13}-C_{14}-C_{15})$ | A                     | $\delta(\text{ring } 1)'$ |
| S <sub>30</sub> | $-1.118\delta(C_7-C_8-O_9)+1.118\delta(O_9-C_5-C_6)+1.809\delta(C_6-C_7-C_8)-1.809\delta(C_5-C_6-C_7)$                                                                                                                                                                                                       | A                     | $\delta(\text{ring } 2)$  |
| S <sub>31</sub> | $-1.118\delta(C_{15}-C_{16}-O_{17})+1.118\delta(O_{17}-C_{13}-C_{14})+1.809\delta(C_{14}-C_{15}-C_{16})-1.809\delta(C_{13}-C_{14}-C_{15})$                                                                                                                                                                   | A                     | $\delta(\text{ring } 2)'$ |
| S <sub>32</sub> | $\delta(C_5-C_6-H_{10})-\delta(C_7-C_6-H_{10})+\delta(C_6-C_7-H_{11})-\delta(C_8-C_7-H_{11})+\delta(C_7-C_8-H_{12})-\delta(O_9-C_8-H_{12})$                                                                                                                                                                  | A                     | $\delta(C-H 1)$           |
| S <sub>33</sub> | $\delta(C_{13}-C_{14}-H_{18})-\delta(C_{15}-C_{14}-H_{18})+\delta(C_{14}-C_{15}-H_{19})-\delta(C_{16}-C_{15}-H_{19})+\delta(C_{15}-C_{16}-H_{20})-$<br>$-\delta(O_{17}-C_{16}-H_{20})$                                                                                                                       | A                     | $\delta(C-H 1)'$          |

Supplementary Material for PCCP

This journal is © The Owner Societies 2006

|                 |                                                                                                                                                                                                                                                                                                                                                 |   |                         |
|-----------------|-------------------------------------------------------------------------------------------------------------------------------------------------------------------------------------------------------------------------------------------------------------------------------------------------------------------------------------------------|---|-------------------------|
| S <sub>34</sub> | $\delta(C_5-C_6-H_{10})-\delta(C_7-C_6-H_{10})-\delta(C_7-C_8-H_{12})+\delta(O_9-C_8-H_{12})+$<br>$+\delta(C_{13}-C_{14}-H_{18})-\delta(C_{15}-C_{14}-H_{18})-\delta(C_{15}-C_{16}-H_{20})+\delta(O_{17}-C_{16}-H_{20})$                                                                                                                        | A | $\delta(C-H\ 2)$        |
| S <sub>35</sub> | $\delta(C_5-C_6-H_{10})-\delta(C_7-C_6-H_{10})-\delta(C_7-C_8-H_{12})+\delta(O_9-C_8-H_{12})-$<br>$-\delta(C_{13}-C_{14}-H_{18})+\delta(C_{15}-C_{14}-H_{18})+\delta(C_{15}-C_{16}-H_{20})-\delta(O_{17}-C_{16}-H_{20})$                                                                                                                        | A | $\delta(C-H\ 2)'$       |
| S <sub>36</sub> | $\delta(C_5-C_6-H_{10})-\delta(C_7-C_6-H_{10})-2\delta(C_6-C_7-H_{11})+2\delta(C_8-C_7-H_{11})+\delta(C_7-C_8-H_{12})-$<br>$-\delta(O_9-C_8-H_{12})+\delta(C_{13}-C_{14}-H_{18})-\delta(C_{15}-C_{14}-H_{18})-2\delta(C_{14}-C_{15}-H_{19})+2\delta(C_{16}-C_{15}-H_{19})+$<br>$+\delta(C_{15}-C_{16}-H_{20})-\delta(O_{17}-C_{16}-H_{20})$     | A | $\delta(C-H\ 3)$        |
| S <sub>37</sub> | $\delta(C_5-C_6-H_{10})-\delta(C_7-C_6-H_{10})-2\delta(C_6-C_7-H_{11})+2\delta(C_8-C_7-H_{11})+\delta(C_7-C_8-H_{12})-$<br>$-\delta(O_9-C_8-H_{12})-\delta(C_{13}-C_{14}-H_{18})+\delta(C_{15}-C_{14}-H_{18})+2\delta(C_{14}-C_{15}-H_{19})-2\delta(C_{16}-C_{15}-H_{19})-$<br>$-\delta(C_{15}-C_{16}-H_{20})+\delta(O_{17}-C_{16}-H_{20})$     | A | $\delta(C-H\ 3)'$       |
| S <sub>38</sub> | $\tau(C_8-C_7-C_6-C_5)-0.809\tau(O_9-C_8-C_7-C_6)-0.809\tau(C_7-C_6-C_5-O_9)+0.309\tau(C_5-O_9-C_8-C_7)+$<br>$+0.309\tau(C_6-C_5-O_9-C_8)+\tau(C_{16}-C_{15}-C_{14}-C_{13})-0.809\tau(O_{17}-C_{16}-C_{15}-C_{14})-$<br>$-0.809\tau(C_{15}-C_{14}-C_{13}-O_{17})+0.309\tau(C_{13}-O_{17}-C_{16}-C_{15})+0.309\tau(C_{14}-C_{13}-O_{17}-C_{16})$ | A | $\tau(\text{ring } 1)$  |
| S <sub>39</sub> | $\tau(C_8-C_7-C_6-C_5)-0.809\tau(O_9-C_8-C_7-C_6)-0.809\tau(C_7-C_6-C_5-O_9)+0.309\tau(C_5-O_9-C_8-C_7)+$<br>$+0.309\tau(C_6-C_5-O_9-C_8)-\tau(C_{16}-C_{15}-C_{14}-C_{13})+0.809\tau(O_{17}-C_{16}-C_{15}-C_{14})+$<br>$+0.809\tau(C_{15}-C_{14}-C_{13}-O_{17})-0.309\tau(C_{13}-O_{17}-C_{16}-C_{15})-0.309\tau(C_{14}-C_{13}-O_{17}-C_{16})$ | A | $\tau(\text{ring } 1)'$ |
| S <sub>40</sub> | $1.118\tau(O_9-C_8-C_7-C_6)-1.118\tau(C_7-C_6-C_5-O_9)-1.809\tau(C_5-O_9-C_8-C_7)+$<br>$+1.809\tau(C_6-C_5-O_9-C_8)+1.118\tau(O_{17}-C_{16}-C_{15}-C_{14})-1.118\tau(C_{15}-C_{14}-C_{13}-O_{17})-$<br>$-1.809\tau(C_{13}-O_{17}-C_{16}-C_{15})+1.809\tau(C_{14}-C_{13}-O_{17}-C_{16})$                                                         | A | $\tau(\text{ring } 2)$  |
| S <sub>41</sub> | $1.118\tau(O_9-C_8-C_7-C_6)-1.118\tau(C_7-C_6-C_5-O_9)-1.809\tau(C_5-O_9-C_8-C_7)+$<br>$+1.809\tau(C_6-C_5-O_9-C_8)-1.118\tau(O_{17}-C_{16}-C_{15}-C_{14})+1.118\tau(C_{15}-C_{14}-C_{13}-O_{17})+$<br>$+1.809\tau(C_{13}-O_{17}-C_{16}-C_{15})-1.809\tau(C_{14}-C_{13}-O_{17}-C_{16})$                                                         | A | $\tau(\text{ring } 2)'$ |
| S <sub>42</sub> | $\gamma(C_1-C_6-C_5-O_9)$                                                                                                                                                                                                                                                                                                                       | A | $\gamma(\text{ring})$   |
| S <sub>43</sub> | $\gamma(C_3-C_{14}-C_{13}-O_{17})$                                                                                                                                                                                                                                                                                                              | A | $\gamma(\text{ring})'$  |
| S <sub>44</sub> | $\tau(O_2=C_1-C_3=O_4)+\tau(O_2=C_1-C_3-C_{13})+\tau(C_5-C_1-C_3-C_{13})+\tau(C_5-C_1-C_3=O_4)$                                                                                                                                                                                                                                                 | A | $\tau(C-C)$             |
| S <sub>45</sub> | $\tau(O_9-C_5-C_1-C_3)+\tau(C_6-C_5-C_1-C_3)+\tau(O_9-C_5-C_1=O_2)+\tau(C_6-C_5-C_1=O_2)+$<br>$+\tau(O_9-C_5-C_1=O_2)+\tau(C_6-C_5-C_1=O_2)+\tau(O_{17}-C_{13}-C_3=O_4)+\tau(C_{14}-C_{13}-C_3=O_4)$                                                                                                                                            | A | $\tau(C-C_\alpha)$      |
| S <sub>46</sub> | $\tau(O_9-C_5-C_1-C_3)+\tau(C_6-C_5-C_1-C_3)-\tau(O_{17}-C_{13}-C_3-C_1)-\tau(C_{14}-C_{13}-C_3-C_1)+$<br>$+\tau(O_9-C_5-C_1=O_2)+\tau(C_6-C_5-C_1=O_2)-\tau(O_{17}-C_{13}-C_3=O_4)-\tau(C_{14}-C_{13}-C_3=O_4)$                                                                                                                                | A | $\tau(C-C_\alpha)'$     |
| S <sub>47</sub> | $\gamma(O_2=C_3-C_1-C_5)+\gamma(O_4=C_1-C_3-C_{13})$                                                                                                                                                                                                                                                                                            | A | $\gamma(C=O)$           |
| S <sub>48</sub> | $\gamma(O_2=C_3-C_1-C_5)-\gamma(O_4=C_1-C_3-C_{13})$                                                                                                                                                                                                                                                                                            | A | $\gamma(C=O)'$          |
| S <sub>49</sub> | $\gamma(H_{10}-C_5-C_6-C_7)+\gamma(H_{11}-C_6-C_7-C_8)+\gamma(H_{12}-C_7-C_8-O_9)$                                                                                                                                                                                                                                                              | A | $\gamma(C-H\ 1)$        |
| S <sub>50</sub> | $\gamma(H_{19}-C_{13}-C_{14}-C_{15})+\gamma(H_{19}-C_{14}-C_{15}-C_{16})+\gamma(H_{20}-C_{15}-C_{16}-O_{17})$                                                                                                                                                                                                                                   | A | $\gamma(C-H\ 1)'$       |
| S <sub>51</sub> | $\gamma(H_{10}-C_5-C_6-C_7)-\gamma(H_{12}-C_7-C_8-O_9)+\gamma(H_{19}-C_{13}-C_{14}-C_{15})-\gamma(H_{20}-C_{15}-C_{16}-O_{17})$                                                                                                                                                                                                                 | A | $\gamma(C-H\ 2)$        |
| S <sub>52</sub> | $\gamma(H_{10}-C_5-C_6-C_7)-\gamma(H_{12}-C_7-C_8-O_9)-\gamma(H_{19}-C_{13}-C_{14}-C_{15})+\gamma(H_{20}-C_{15}-C_{16}-O_{17})$                                                                                                                                                                                                                 | A | $\gamma(C-H\ 2)'$       |
| S <sub>53</sub> | $\gamma(H_{10}-C_5-C_6-C_7)-2\gamma(H_{11}-C_6-C_7-C_8)+\gamma(H_{12}-C_7-C_8-O_9)$                                                                                                                                                                                                                                                             | A | $\gamma(C-H\ 3)$        |
| S <sub>54</sub> | $\gamma(H_{19}-C_{13}-C_{14}-C_{15})-2\gamma(H_{19}-C_{14}-C_{15}-C_{16})+\gamma(H_{20}-C_{15}-C_{16}-O_{17})$                                                                                                                                                                                                                                  | A | $\gamma(C-H\ 3)'$       |

<sup>a</sup> Normalization factors not shown.  $\nu$ , bond stretching,  $\delta$ , bending,  $\gamma$ , rocking,  $\omega$ , wagging,  $\tau$ , torsion. See Figure 1 for atom numbering.

<sup>b</sup> C<sub>1</sub> symmetry point group.

Supplementary Material for PCCP  
This journal is © The Owner Societies 2006

Table S3 - Calculated [scaled, DFT(B3LYP)/6-311++G(d,p)] wavenumbers, IR intensities and Potential Energy Distributions (PED) for conformer **I** of  $\alpha$ -fural.<sup>a</sup>

| Approximate description | Wavenumber <sup>b</sup> | Intensity | PED <sup>c</sup>                                                                                            |
|-------------------------|-------------------------|-----------|-------------------------------------------------------------------------------------------------------------|
| v(C-H 1) as             | 3209.0                  | 6.5       | S <sub>17</sub> (69), S <sub>19</sub> (24)                                                                  |
| v(C-H 1) s              | 3209.0                  | <0.1      | S <sub>16</sub> (69), S <sub>18</sub> (24)                                                                  |
| v(C-H 2) s              | 3199.9                  | <0.1      | S <sub>16</sub> (27), S <sub>18</sub> (71)                                                                  |
| v(C-H 2) as             | 3199.9                  | 0.8       | S <sub>17</sub> (27), S <sub>19</sub> (71)                                                                  |
| v(C-H 3) s              | 3177.3                  | <0.1      | S <sub>20</sub> (93)                                                                                        |
| v(C-H 3) as             | 3177.2                  | 2.3       | S <sub>21</sub> (93)                                                                                        |
| v(C=O) s                | 1681.7                  | 48.6      | S <sub>2</sub> (86)                                                                                         |
| v(C=O) as               | 1675.2                  | 560.2     | S <sub>3</sub> (96)                                                                                         |
| v(ring 3) s             | 1554.9                  | 2.1       | S <sub>4</sub> (10), S <sub>10</sub> (65), S <sub>34</sub> (13)                                             |
| v(ring 3) as            | 1550.8                  | 51.3      | S <sub>11</sub> (67), S <sub>35</sub> (14)                                                                  |
| v(ring 2) s             | 1456.9                  | 2.0       | S <sub>8</sub> (55), S <sub>28</sub> (10)                                                                   |
| v(ring 2) as            | 1448.1                  | 214.2     | S <sub>9</sub> (59), S <sub>29</sub> (10)                                                                   |
| v(ring 4) s             | 1396.1                  | 3.3       | S <sub>12</sub> (39), S <sub>32</sub> (18), S <sub>34</sub> (14), S <sub>36</sub> (10)                      |
| v(ring 4) as            | 1393.2                  | 85.5      | S <sub>13</sub> (42), S <sub>33</sub> (15), S <sub>35</sub> (16), S <sub>37</sub> (12)                      |
| v(C-C <sub>α</sub> ) s  | 1299.6                  | 3.2       | S <sub>1</sub> (13), S <sub>4</sub> (24), S <sub>6</sub> (11), S <sub>8</sub> (14), S <sub>22</sub> (15)    |
| v(C-C <sub>α</sub> ) as | 1248.3                  | 160.4     | S <sub>5</sub> (30), S <sub>7</sub> (33)                                                                    |
| δ(C-H 1) s              | 1219.8                  | 0.3       | S <sub>32</sub> (67)                                                                                        |
| δ(C-H 1) as             | 1219.2                  | 1.7       | S <sub>33</sub> (64)                                                                                        |
| v(ring 5) s             | 1164.7                  | 0.1       | S <sub>14</sub> (57), S <sub>34</sub> (19)                                                                  |
| v(ring 5) as            | 1162.3                  | 12.7      | S <sub>9</sub> (14), S <sub>15</sub> (50), S <sub>35</sub> (20)                                             |
| v(ring 1) s             | 1098.9                  | <0.1      | S <sub>6</sub> (64)                                                                                         |
| δ(C-H 2) as             | 1088.6                  | 48.9      | S <sub>7</sub> (30), S <sub>11</sub> (11), S <sub>15</sub> (14), S <sub>35</sub> (15), S <sub>37</sub> (12) |
| δ(C-H 3) s              | 1063.2                  | 0.1       | S <sub>1</sub> (12), S <sub>8</sub> (11), S <sub>14</sub> (10), S <sub>36</sub> (32)                        |
| δ(C-H 3) as             | 1021.2                  | 161.7     | S <sub>13</sub> (28), S <sub>35</sub> (16), S <sub>37</sub> (47)                                            |
| δ(C-H 2) s              | 1008.8                  | 3.8       | S <sub>12</sub> (35), S <sub>34</sub> (24), S <sub>36</sub> (24)                                            |
| v(ring 1) as            | 928.2                   | 39.3      | S <sub>7</sub> (19), S <sub>13</sub> (11), S <sub>15</sub> (20), S <sub>29</sub> (17)                       |
| δ(ring 1) s             | 906.7                   | 2.2       | S <sub>14</sub> (10), S <sub>28</sub> (41), S <sub>30</sub> (11)                                            |
| γ(C-H 3) as             | 898.8                   | 1.4       | S <sub>52</sub> (14), S <sub>54</sub> (89)                                                                  |
| γ(C-H 3) s              | 898.0                   | 3.6       | S <sub>51</sub> (12), S <sub>53</sub> (93)                                                                  |
| δ(ring 2) as            | 884.3                   | 26.5      | S <sub>29</sub> (38), S <sub>31</sub> (51)                                                                  |
| δ(ring 2) s             | 883.2                   | 0.8       | S <sub>28</sub> (25), S <sub>30</sub> (64)                                                                  |
| γ(C-H 2) as             | 853.1                   | <0.1      | S <sub>48</sub> (10), S <sub>52</sub> (67), S <sub>54</sub> (22)                                            |
| γ(C-H 2) s              | 847.2                   | 7.1       | S <sub>51</sub> (83), S <sub>53</sub> (18)                                                                  |
| γ(C=O) as               | 809.0                   | 27.1      | S <sub>48</sub> (58), S <sub>52</sub> (14)                                                                  |
| γ(C-H 1) s              | 764.2                   | 121.2     | S <sub>49</sub> (86)                                                                                        |
| γ(C-H 1) as             | 763.7                   | 3.7       | S <sub>50</sub> (87)                                                                                        |
| δ(ring 1) as            | 758.2                   | 243.6     | S <sub>23</sub> (28), S <sub>29</sub> (11), S <sub>31</sub> (13), S <sub>48</sub> (12)                      |
| v(C-C)                  | 687.8                   | 2.4       | S <sub>24</sub> (14), S <sub>40</sub> (25), S <sub>42</sub> (17), S <sub>47</sub> (19), S <sub>1</sub> (10) |
| τ(ring 2) s             | 634.6                   | 1.5       | S <sub>24</sub> (24), S <sub>40</sub> (31)                                                                  |
| τ(ring 2) as            | 617.2                   | 2.8       | S <sub>39</sub> (12), S <sub>41</sub> (76)                                                                  |
| τ(ring 1) s             | 590.0                   | 18.9      | S <sub>38</sub> (87), S <sub>40</sub> (23)                                                                  |
| τ(ring 1) as            | 589.5                   | 0.4       | S <sub>39</sub> (95), S <sub>41</sub> (15)                                                                  |
| ω(ring) as              | 502.3                   | 4.8       | S <sub>5</sub> (32), S <sub>23</sub> (19), S <sub>27</sub> (13), S <sub>29</sub> (12)                       |
| γ(C=O) s                | 466.1                   | 14.7      | S <sub>4</sub> (12), S <sub>40</sub> (17), S <sub>47</sub> (43)                                             |
| δ(C=O) s                | 375.5                   | 2.5       | S <sub>1</sub> (21), S <sub>22</sub> (55)                                                                   |
| ω(ring) s               | 280.6                   | 0.2       | S <sub>1</sub> (22), S <sub>4</sub> (18), S <sub>26</sub> (37)                                              |
| δ(C=O) as               | 278.8                   | 21.5      | S <sub>23</sub> (37), S <sub>25</sub> (24), S <sub>27</sub> (34)                                            |
| δ(CCC <sub>α</sub> ) s  | 193.0                   | 0.6       | S <sub>24</sub> (41), S <sub>26</sub> (38)                                                                  |
| γ(ring) as              | 171.2                   | 0.1       | S <sub>43</sub> (80)                                                                                        |
| γ(ring) s               | 156.8                   | 0.2       | S <sub>42</sub> (67), S <sub>47</sub> (19)                                                                  |
| δ(CCC <sub>α</sub> ) as | 126.0                   | 2.5       | S <sub>25</sub> (45), S <sub>27</sub> (26), S <sub>46</sub> (24)                                            |
| τ(C-C <sub>α</sub> ) as | 74.0                    | 1.5       | S <sub>25</sub> (17), S <sub>46</sub> (77)                                                                  |
| τ(C-C <sub>α</sub> ) s  | 60.7                    | 0.5       | S <sub>45</sub> (97)                                                                                        |
| τ(C-C)                  | 21.7                    | 6.5       | S <sub>44</sub> (91)                                                                                        |

<sup>a</sup> Wavenumbers in cm<sup>-1</sup>, calculated intensities in km mol<sup>-1</sup>, v, bond stretching, δ, bending, γ, rocking, ω,

Supplementary Material for PCCP

This journal is © The Owner Societies 2006

wagging,  $\tau$ , torsion, s, symmetric, as, asymmetric. See Table S1 for definition of internal coordinates and Figure 1 for atom numbering. <sup>b</sup> Scaled (0.978). <sup>c</sup> Only PED values greater than 10 % are given.

Supplementary Material for PCCP  
This journal is © The Owner Societies 2006

Table S4- Calculated [scaled, DFT(B3LYP)/6-311++G(d,p)] wavenumbers, IR intensities and Potential Energy Distributions (PED) for conformer **II** of  $\alpha$ -fural.<sup>a</sup>

| Approximate description | Wavenumber <sup>b</sup> | Intensity | PED <sup>c</sup>                                                                                             |
|-------------------------|-------------------------|-----------|--------------------------------------------------------------------------------------------------------------|
| v(C-H 1)                | 3203.5                  | <0.1      | S <sub>16</sub> (77), S <sub>18</sub> (21)                                                                   |
| v(C-H 1)'               | 3202.9                  | 0.2       | S <sub>17</sub> (94)                                                                                         |
| v(C-H 2)'               | 3195.9                  | 1.1       | S <sub>19</sub> (94)                                                                                         |
| v(C-H 2)                | 3191.3                  | 1.1       | S <sub>16</sub> (21), S <sub>18</sub> (78)                                                                   |
| v(C-H 3)'               | 3177.2                  | 1.4       | S <sub>21</sub> (97)                                                                                         |
| v(C-H 3)                | 3176.2                  | 0.8       | S <sub>20</sub> (99)                                                                                         |
| v(C=O)'                 | 1692.3                  | 265.3     | S <sub>3</sub> (88)                                                                                          |
| v(C=O)                  | 1673.2                  | 302.6     | S <sub>2</sub> (89)                                                                                          |
| v(ring 3)               | 1562.3                  | 63.4      | S <sub>4</sub> (10), S <sub>10</sub> (55)                                                                    |
| v(ring 3)'              | 1554.9                  | 54.7      | S <sub>11</sub> (58), S <sub>35</sub> (12)                                                                   |
| v(ring 2)'              | 1456.9                  | 60.2      | S <sub>8</sub> (22), S <sub>9</sub> (30), S <sub>34</sub> (10)                                               |
| v(ring 2)               | 1450.2                  | 181.6     | S <sub>8</sub> (27), S <sub>9</sub> (29)                                                                     |
| v(ring 4)'              | 1394.5                  | 37.1      | S <sub>13</sub> (40), S <sub>33</sub> (15), S <sub>34</sub> (10)                                             |
| v(ring 4)               | 1390.2                  | 19.5      | S <sub>12</sub> (44), S <sub>32</sub> (14), S <sub>35</sub> (10)                                             |
| v(C-C <sub>α</sub> )    | 1298.5                  | 21.8      | S <sub>1</sub> (12), S <sub>4</sub> (24), S <sub>22</sub> (10)                                               |
| v(C-C <sub>α</sub> )'   | 1248.9                  | 116.3     | S <sub>5</sub> (26), S <sub>6</sub> (17), S <sub>7</sub> (14), S <sub>32</sub> (15)                          |
| δ(C-H 1)'               | 1223.6                  | 2.2       | S <sub>33</sub> (66)                                                                                         |
| δ(C-H 1)                | 1216.3                  | 3.4       | S <sub>14</sub> (25), S <sub>32</sub> (43)                                                                   |
| v(ring 5)'              | 1163.1                  | 4.5       | S <sub>9</sub> (10), S <sub>15</sub> (49), S <sub>34</sub> (13)                                              |
| v(ring 5)               | 1155.5                  | 10.1      | S <sub>8</sub> (23), S <sub>14</sub> (33), S <sub>35</sub> (13)                                              |
| v(ring 1)               | 1105.9                  | 24.7      | S <sub>6</sub> (50), S <sub>7</sub> (19)                                                                     |
| δ(C-H 2)'               | 1088.4                  | 26.5      | S <sub>7</sub> (28), S <sub>15</sub> (13), S <sub>35</sub> (11)                                              |
| δ(C-H 3)                | 1058.9                  | 3.7       | S <sub>1</sub> (12), S <sub>36</sub> (27)                                                                    |
| δ(C-H 3)'               | 1018.5                  | 83.1      | S <sub>13</sub> (28), S <sub>35</sub> (11), S <sub>37</sub> (39)                                             |
| δ(C-H 2)                | 1008.9                  | 40.5      | S <sub>12</sub> (27), S <sub>34</sub> (21), S <sub>36</sub> (24)                                             |
| v(ring 1)'              | 938.3                   | 11.5      | S <sub>7</sub> (11), S <sub>15</sub> (10), S <sub>29</sub> (16)                                              |
| δ(ring 1)               | 905.9                   | 13.2      | S <sub>28</sub> (40)                                                                                         |
| γ(C-H 3)                | 894.0                   | 1.7       | S <sub>53</sub> (93)                                                                                         |
| γ(C-H 3)'               | 888.9                   | 1.4       | S <sub>54</sub> (98)                                                                                         |
| δ(ring 2)               | 884.1                   | 4.8       | S <sub>28</sub> (23), S <sub>30</sub> (56)                                                                   |
| δ(ring 2)'              | 883.3                   | 14.9      | S <sub>29</sub> (27), S <sub>31</sub> (56)                                                                   |
| γ(C-H 2)                | 849.2                   | 7.4       | S <sub>48</sub> (15), S <sub>51</sub> (57), S <sub>53</sub> (12)                                             |
| γ(C-H 2)'               | 840.7                   | 6.5       | S <sub>52</sub> (84)                                                                                         |
| γ(C=O)'                 | 811.9                   | 51.3      | S <sub>23</sub> (15), S <sub>48</sub> (36), S <sub>51</sub> (26)                                             |
| γ(C-H 1)'               | 760.8                   | 76.7      | S <sub>50</sub> (82)                                                                                         |
| γ(C-H 1)                | 759.3                   | 45.3      | S <sub>49</sub> (81)                                                                                         |
| δ(ring 1)'              | 738.3                   | 224.2     | S <sub>23</sub> (19), S <sub>29</sub> (12), S <sub>48</sub> (22)                                             |
| v(C-C)                  | 718.2                   | 9.9       | S <sub>1</sub> (10), S <sub>24</sub> (22), S <sub>47</sub> (29)                                              |
| τ(ring 2)'              | 626.0                   | 5.4       | S <sub>24</sub> (10), S <sub>39</sub> (11), S <sub>41</sub> (53)                                             |
| τ(ring 2)               | 618.5                   | 2.1       | S <sub>40</sub> (75)                                                                                         |
| τ(ring 1)'              | 590.4                   | 14.7      | S <sub>39</sub> (85), S <sub>41</sub> (18)                                                                   |
| τ(ring 1)               | 588.9                   | 2.3       | S <sub>38</sub> (93), S <sub>40</sub> (11)                                                                   |
| δ(C=O)'                 | 489.5                   | 2.8       | S <sub>5</sub> (29), S <sub>23</sub> (16), S <sub>26</sub> (13), S <sub>29</sub> (10)                        |
| γ(C=O)                  | 475.8                   | 8.0       | S <sub>4</sub> (23), S <sub>47</sub> (24)                                                                    |
| δ(C=O)                  | 342.9                   | 3.5       | S <sub>1</sub> (29), S <sub>22</sub> (52)                                                                    |
| ω(ring)'                | 285.5                   | 3.1       | S <sub>1</sub> (13), S <sub>4</sub> (17), S <sub>27</sub> (32)                                               |
| ω(ring)                 | 264.7                   | 24.3      | S <sub>23</sub> (36), S <sub>25</sub> (14), S <sub>26</sub> (33)                                             |
| γ(ring)                 | 174.1                   | 0.2       | S <sub>42</sub> (63), S <sub>43</sub> (12)                                                                   |
| γ(ring)'                | 162.5                   | 0.1       | S <sub>27</sub> (16), S <sub>43</sub> (50)                                                                   |
| δ(CCC <sub>α</sub> )    | 149.8                   | 1.3       | S <sub>24</sub> (34), S <sub>27</sub> (21), S <sub>43</sub> (11), S <sub>44</sub> (12), S <sub>47</sub> (12) |
| δ(CCC <sub>α</sub> )'   | 125.3                   | 0.7       | S <sub>25</sub> (36), S <sub>26</sub> (21), S <sub>46</sub> (37)                                             |
| τ(C-C <sub>α</sub> )'   | 62.3                    | 2.0       | S <sub>25</sub> (21), S <sub>46</sub> (59)                                                                   |
| τ(C-C <sub>α</sub> )    | 55.5                    | 0.4       | S <sub>45</sub> (82)                                                                                         |
| τ(C-C)                  | 25.7                    | 5.0       | S <sub>44</sub> (87)                                                                                         |

<sup>a</sup> Wavenumbers in cm<sup>-1</sup>, calculated intensities in km mol<sup>-1</sup>, v, bond stretching, δ, bending, γ, rocking, ω,



Supplementary Material for PCCP

This journal is © The Owner Societies 2006

wagging,  $\tau$ , torsion. See Table S2 for definition of internal coordinates and Figure 1 for atom numbering.<sup>b</sup>  
Scaled (0.978).<sup>c</sup> Only PED values greater than 10 % are given.

Supplementary Material for PCCP  
This journal is © The Owner Societies 2006

Table S5- Calculated [scaled, DFT(B3LYP)/6-311++G(d,p)] wavenumbers, IR intensities and Potential Energy Distributions (PED) for conformer **III** of  $\alpha$ -fural.<sup>a</sup>

| Approximate description | Wavenumber <sup>b</sup> | Intensity | PED <sup>c</sup>                                                                                            |
|-------------------------|-------------------------|-----------|-------------------------------------------------------------------------------------------------------------|
| v(C-H 1) as             | 3203.5                  | <0.1      | S <sub>17</sub> (76), S <sub>19</sub> (22)                                                                  |
| v(C-H 1) s              | 3203.5                  | <0.1      | S <sub>16</sub> (76), S <sub>18</sub> (22)                                                                  |
| v(C-H 2) s              | 3190.8                  | 0.6       | S <sub>16</sub> (22), S <sub>18</sub> (77)                                                                  |
| v(C-H 2) as             | 3190.7                  | 1.8       | S <sub>17</sub> (22), S <sub>19</sub> (77)                                                                  |
| v(C-H 3) s              | 3175.9                  | 0.3       | S <sub>20</sub> (99)                                                                                        |
| v(C-H 3) as             | 3175.9                  | 1.2       | S <sub>21</sub> (99)                                                                                        |
| v(C=O) s                | 1692.5                  | 183.9     | S <sub>2</sub> (90)                                                                                         |
| v(C=O) as               | 1683.1                  | 345.9     | S <sub>3</sub> (95)                                                                                         |
| v(ring 3) s             | 1568.2                  | 36.6      | S <sub>4</sub> (14), S <sub>10</sub> (62), S <sub>34</sub> (10)                                             |
| v(ring 3) as            | 1562.8                  | 146.3     | S <sub>5</sub> (10), S <sub>11</sub> (66), S <sub>35</sub> (12)                                             |
| v(ring 2) s             | 1459.1                  | 90.3      | S <sub>4</sub> (10), S <sub>8</sub> (47), S <sub>34</sub> (12)                                              |
| v(ring 2) as            | 1452.6                  | 185.9     | S <sub>9</sub> (54), S <sub>35</sub> (11)                                                                   |
| v(ring 4) s             | 1388.7                  | 4.5       | S <sub>12</sub> (44), S <sub>32</sub> (15), S <sub>34</sub> (18), S <sub>36</sub> (11)                      |
| v(ring 4) as            | 1387.5                  | 17.8      | S <sub>13</sub> (44), S <sub>33</sub> (14), S <sub>35</sub> (18), S <sub>37</sub> (12)                      |
| v(C-C <sub>α</sub> ) s  | 1286.3                  | 2.6       | S <sub>1</sub> (12), S <sub>4</sub> (23), S <sub>6</sub> (11), S <sub>8</sub> (16), S <sub>32</sub> (18)    |
| v(C-C <sub>α</sub> ) as | 1243.1                  | 123.1     | S <sub>5</sub> (21), S <sub>7</sub> (28), S <sub>33</sub> (34)                                              |
| δ(C-H 1) s              | 1216.5                  | 3.0       | S <sub>14</sub> (23), S <sub>32</sub> (48)                                                                  |
| δ(C-H 1) as             | 1211.2                  | 10.1      | S <sub>15</sub> (28), S <sub>33</sub> (32)                                                                  |
| v(ring 5) s             | 1155.4                  | 0.1       | S <sub>8</sub> (22), S <sub>14</sub> (35), S <sub>34</sub> (18), S <sub>36</sub> (13)                       |
| v(ring 5) as            | 1153.6                  | 25.3      | S <sub>9</sub> (24), S <sub>15</sub> (33), S <sub>35</sub> (18), S <sub>37</sub> (13)                       |
| v(ring 1) s             | 1109.5                  | 19.6      | S <sub>6</sub> (71)                                                                                         |
| v(ring 1) as            | 1088.3                  | 33.2      | S <sub>7</sub> (40), S <sub>15</sub> (15), S <sub>35</sub> (10), S <sub>37</sub> (11)                       |
| δ(C-H 3) s              | 1052.4                  | 0.1       | S <sub>1</sub> (13), S <sub>10</sub> (14), S <sub>14</sub> (15), S <sub>36</sub> (24)                       |
| δ(C-H 3) as             | 1011.8                  | 104.0     | S <sub>13</sub> (31), S <sub>35</sub> (18), S <sub>37</sub> (45)                                            |
| δ(C-H 2) s              | 1008.2                  | 1.5       | S <sub>12</sub> (30), S <sub>34</sub> (28), S <sub>36</sub> (30)                                            |
| δ(C-H 2) as             | 946.6                   | 9.4       | S <sub>7</sub> (15), S <sub>11</sub> (10), S <sub>15</sub> (15), S <sub>29</sub> (15), S <sub>35</sub> (11) |
| δ(ring 1) s             | 900.5                   | 0.1       | S <sub>14</sub> (12), S <sub>28</sub> (33), S <sub>30</sub> (21)                                            |
| γ(C-H 3) as             | 892.7                   | 1.3       | S <sub>52</sub> (11), S <sub>54</sub> (95)                                                                  |
| γ(C-H 3) s              | 891.9                   | 1.4       | S <sub>51</sub> (10), S <sub>53</sub> (97)                                                                  |
| δ(ring 2) as            | 883.4                   | 12.7      | S <sub>29</sub> (28), S <sub>31</sub> (61)                                                                  |
| δ(ring 2) s             | 883.1                   | 1.3       | S <sub>28</sub> (36), S <sub>30</sub> (53)                                                                  |
| γ(C-H 2) as             | 847.4                   | 20.5      | S <sub>48</sub> (13), S <sub>52</sub> (54), S <sub>54</sub> (18)                                            |
| γ(C-H 2) s              | 840.4                   | 4.4       | S <sub>51</sub> (78), S <sub>53</sub> (16)                                                                  |
| γ(C=O) as               | 813.4                   | 76.4      | S <sub>23</sub> (20), S <sub>29</sub> (12), S <sub>48</sub> (25), S <sub>52</sub> (27)                      |
| γ(C-H 1) s              | 758.3                   | 74.1      | S <sub>49</sub> (84), S <sub>51</sub> (12)                                                                  |
| γ(C-H 1) as             | 757.8                   | 45.3      | S <sub>50</sub> (86), S <sub>52</sub> (11)                                                                  |
| v(C-C)                  | 739.8                   | 16.3      | S <sub>1</sub> (10), S <sub>24</sub> (22), S <sub>47</sub> (38)                                             |
| δ(ring 1) as            | 717.3                   | 203.6     | S <sub>23</sub> (13), S <sub>25</sub> (11), S <sub>29</sub> (11), S <sub>48</sub> (27)                      |
| τ(ring 2) as            | 619.1                   | 3.6       | S <sub>41</sub> (82)                                                                                        |
| τ(ring 2) s             | 618.9                   | 4.9       | S <sub>40</sub> (79)                                                                                        |
| τ(ring 1) s             | 590.8                   | 9.9       | S <sub>38</sub> (95), S <sub>40</sub> (12)                                                                  |
| τ(ring 1) as            | 589.3                   | 3.7       | S <sub>39</sub> (99)                                                                                        |
| γ(C=O) s                | 483.1                   | 4.1       | S <sub>4</sub> (30), S <sub>47</sub> (16)                                                                   |
| δ(C=O) as               | 481.9                   | 1.4       | S <sub>5</sub> (29), S <sub>23</sub> (15), S <sub>27</sub> (13)                                             |
| δ(C=O) s                | 329.8                   | 2.9       | S <sub>1</sub> (39), S <sub>22</sub> (43)                                                                   |
| ω(ring) s               | 283.0                   | 2.4       | S <sub>4</sub> (13), S <sub>22</sub> (17), S <sub>26</sub> (32)                                             |
| ω(ring) as              | 261.8                   | 30.4      | S <sub>23</sub> (35), S <sub>25</sub> (11), S <sub>27</sub> (31)                                            |
| γ(ring) as              | 173.9                   | 0.3       | S <sub>43</sub> (73)                                                                                        |
| γ(ring) s               | 167.6                   | 0.1       | S <sub>42</sub> (75)                                                                                        |
| δ(CCC <sub>α</sub> ) s  | 126.2                   | 0.9       | S <sub>24</sub> (44), S <sub>26</sub> (34)                                                                  |
| δ(CCC <sub>α</sub> ) as | 122.1                   | 0.1       | S <sub>25</sub> (36), S <sub>27</sub> (24), S <sub>46</sub> (36)                                            |
| τ(C-C <sub>α</sub> ) s  | 58.2                    | 0.6       | S <sub>45</sub> (86)                                                                                        |
| τ(C-C <sub>α</sub> ) as | 56.3                    | 2.2       | S <sub>25</sub> (21), S <sub>46</sub> (60)                                                                  |
| τ(C-C)                  | 21.8                    | 3.6       | S <sub>44</sub> (90)                                                                                        |

<sup>a</sup> Wavenumbers in cm<sup>-1</sup>, calculated intensities in km mol<sup>-1</sup>, v, bond stretching, δ, bending, γ, rocking, ω,

Supplementary Material for PCCP

This journal is © The Owner Societies 2006

wagging,  $\tau$ , torsion, s, symmetric, as, asymmetric. See Table S1 for definition of internal coordinates and Figure 1 for atom numbering. <sup>b</sup> Scaled (0.978). <sup>c</sup> Only PED values greater than 10 % are given.
